# Supplementary material for: Fungi Detected in the Previous Year’s Leaf Petioles of Fraxinus excelsior and Their Antagonistic Potential against Hymenoscyphus fraxineus
Source: MDPI journal article supplement (doi:10.3390/f12101412), 2021-10-16
Supplement: s1 [file s1]

**Table S1.** List of morphotypes from the previous year's leaf petioles of *Fraxinus excelsior* in five forest stands, in southern Poland in 2017. Sequences deposited in GenBank. Reference sequences from GenBank. Results of interactions of test fungi with two isolates of *Hymenoscyphus fraxineus* (Hf 1/Hf 2) *in vitro*.

| Taxa                            | Strain No. | ITS<br>Accession | BLAST    | Identities % | Interaction Type<br>Hf 1/Hf 2 <sup>1</sup> | Growth Reduction<br>of Hf 1/Hf 2 <sup>2</sup> | Reduction of Growth of Test Fungus<br>with Hf 1/Hf 2 <sup>3</sup> |
|---------------------------------|------------|------------------|----------|--------------|--------------------------------------------|-----------------------------------------------|-------------------------------------------------------------------|
| Agaricomycetes sp.              | FeF179     | MZ493076         | KC588730 | 95.99        | A/A                                        | b/c                                           | b/a                                                               |
| Agaricomycetes sp.              | FeF183     | MZ493077         | KC588730 | 95.31        | A/A                                        | b/b                                           | a/a                                                               |
| <i>Alternaria</i> sp. 1         | FeF152     | MZ492922         | MK910060 | 100.00       | A/A                                        | c/c                                           | b/b                                                               |
| <i>Alternaria</i> sp. 1         | FeF83      | MZ492923         | MK910060 | 100.00       | A/A                                        | c/c                                           | b/b                                                               |
| <i>Alternaria</i> sp. 1         | FeF98      | MZ492924         | MK910060 | 100.00       | A/A                                        | c/c                                           | b/b                                                               |
| <i>Alternaria</i> sp. 1         | FeF12      | MZ492925         | MK910060 | 100.00       | A/A                                        | c/c                                           | b/b                                                               |
| <i>Alternaria</i> sp. 2         | FeF21      | MZ492919         | MN077468 | 100.00       | A/A                                        | c/c                                           | b/b                                                               |
| <i>Alternaria</i> sp. 3         | FeF182     | MZ492920         | MK460776 | 100.00       | A/A                                        | c/d                                           | a/a                                                               |
| <i>Alternaria</i> sp. 4         | FeF11      | MZ492921         | JX454532 | 99.84        | A/A                                        | c/c                                           | a/a                                                               |
| <i>Athelia</i> sp.              | FeF124     | MZ493075         | GU187504 | 100.00       | Bm/Bm                                      | c/c                                           | b/b                                                               |
| <i>Aureobasidium pullulans</i>  | FeF16      | MZ493028         | MK460802 | 99.83        | Bm/Bm                                      | c/c                                           | c/b                                                               |
| <i>Boeremia exigua</i>          | FeF131     | MZ492929         | MF599108 | 99.82        | Bw/Bw                                      | c/c                                           | b/a                                                               |
| <i>Boeremia</i> sp.             | FeF151     | MZ492926         | MN540289 | 100.00       | A/A                                        | b/c                                           | b/b                                                               |
| <i>Boeremia</i> sp.             | FeF174     | MZ492927         | MN540289 | 100.00       | A/A                                        | c/c                                           | b/b                                                               |
| <i>Boeremia</i> sp.             | FeF123     | MZ492928         | MN540289 | 100.00       | A/A                                        | c/c                                           | b/b                                                               |
| <i>Chaetomium globosum</i>      | FeF113     | MZ493042         | MG098250 | 99.66        | A/A                                        | b/c                                           | b/b                                                               |
| <i>Chromelosporium</i> sp.      | FeF10      | MZ493102         | MG098273 | 99.53        | A/A                                        | c/c                                           | b/b                                                               |
| <i>Cladosporium</i> sp. 1       | FeF156     | MZ493026         | MH047193 | 100.00       | A/A                                        | b/b                                           | b/b                                                               |
| <i>Cladosporium</i> sp. 2       | FeF38      | MZ493027         | MT466517 | 100.00       | A/A                                        | b/b                                           | b/b                                                               |
| <i>Clonostachys rosea</i>       | FeF195     | MZ493031         | AJ876484 | 100.00       | C/C                                        | c/c                                           | a/a                                                               |
| <i>Colletotrichum acutatum</i>  | FeF33      | MZ493039         | AJ301971 | 99.83        | A/A                                        | c/c                                           | b/b                                                               |
| <i>Coniochaeta angustispora</i> | FeF36      | MZ493043         | MH859528 | 99.83        | Bv/Bv                                      | c/c                                           | f/f                                                               |
| <i>Coniochaeta</i> sp. 1        | FeF5       | MZ493048         | LC431571 | 100.00       | Bs/Bs                                      | c/c                                           | b/b                                                               |
| <i>Coniochaeta</i> sp. 1        | FeF40      | MZ493049         | LC431571 | 100.00       | Bm/Bm                                      | c/c                                           | b/b                                                               |
| <i>Coniochaeta</i> sp. 1        | FeF159     | MZ493047         | LC431571 | 100.00       | Bs/Bs                                      | c/c                                           | b/b                                                               |

|                                             |         |          |          |        |       |     |     |
|---------------------------------------------|---------|----------|----------|--------|-------|-----|-----|
| <i>Coniochaeta</i> sp. 1                    | FeF220  | MZ493050 | LC431571 | 99.66  | Bs/Bs | c/c | b/b |
| <i>Coniochaeta</i> sp. 2                    | FeF157  | MZ493044 | AY198390 | 99.17  | A/A   | c/c | b/b |
| <i>Coniochaeta</i> sp. 7                    | FeF7    | MZ493045 | AY198390 | 99.83  | Bs/Bs | b/b | b/b |
| <i>Coniochaeta</i> sp. 7                    | FeF25   | MZ493046 | AY198390 | 99.83  | Bs/Bs | c/c | a/a |
| <i>Coniothyrium</i> cf. <i>dispersellum</i> | FeF65   | MZ492931 | MH860812 | 99.45  | A/A   | b/b | a/a |
| <i>Coniothyrium</i> cf. <i>dispersellum</i> | FeF71   | MZ492932 | MH860812 | 99.45  | A/A   | b/b | a/a |
| <i>Coniothyrium</i> cf. <i>dispersellum</i> | FeF94b  | MZ492930 | MH860812 | 99.45  | A/A   | b/b | f/a |
| <i>Coprinellus disseminatus</i>             | FeF87   | MZ493093 | MN540299 | 99.60  | Bm/Bm | b/c | b/b |
| <i>Coprinellus disseminatus</i>             | FeF231  | MZ493094 | MN540299 | 99.73  | Bs/Bs | c/c | b/b |
| <i>Coprinellus micaceus</i>                 | FeF232  | MZ493095 | KU712252 | 99.71  | Bm/Bm | b/c | b/b |
| <i>Cyathicula coronata</i>                  | FeF111  | MZ492975 | MH858141 | 99.82  | Bm/Bm | c/c | f/a |
| <i>Cyathicula fraxinophila</i>              | FeF255  | MZ492981 | MK584998 | 98.73  | Bs/Bs | a/a | f/f |
| <i>Cyathicula fraxinophila</i>              | FeF256  | MZ492979 | MK584998 | 99.07  | Bs/Bs | a/a | f/f |
| <i>Cyathicula</i> sp. 2                     | FeF254  | MZ492977 | MK584998 | 98.70  | Bs/Bs | b/b | b/b |
| <i>Cytospora pruinosa</i>                   | FeF155  | MZ493054 | MH854814 | 99.84  | Bv/Bv | c/c | b/b |
| <i>Cytospora pruinosa</i>                   | FeF165  | MZ493055 | MH854814 | 99.84  | Bv/Bv | c/c | b/b |
| <i>Cytospora</i> sp.                        | FeF116  | MZ493053 | FJ478099 | 99.53  | Bm/Bm | d/d | b/b |
| <i>Dactylaria</i> sp.                       | FeF108a | MZ493066 | JF449852 | 99.83  | Bs/Bs | c/c | a/a |
| <i>Desmazierella acicola</i>                | FeF42   | MZ493073 | MT790315 | 99.85  | Bm/Bm | c/c | c/c |
| <i>Desmazierella acicola</i>                | FeF119  | MZ493072 | MT790315 | 100.00 | C/C   | c/c | c/c |
| <i>Diaporthe eres</i>                       | FeF35   | MZ493056 | EU571099 | 100.00 | A/A   | c/c | b/b |
| <i>Discohainesia oenotherae</i>             | FeF137  | MZ493029 | MH855313 | 100.00 | Bm/Bm | c/c | b/b |
| <i>Discohainesia oenotherae</i>             | FeF138  | MZ493030 | MH855313 | 99.79  | Bm/Bm | c/c | b/b |
| <i>Epicoccum nigrum</i>                     | FeF75   | MZ492941 | FN868456 | 100.00 | Bs/Bs | c/c | b/b |
| <i>Eupenicillium</i> sp.                    | FeF68   | MZ493071 | JX545183 | 99.17  | Bs/Bs | b/b | b/b |
| <i>Fellozyma</i> sp.                        | FeF236  | MZ493103 | KY103411 | 99.05  | Bs/Bs | b/b | a/a |
| <i>Fusariella</i> sp.                       | FeF257  | MZ493041 | FJ820737 | 99.34  | A/A   | a/a | f/f |
| <i>Fusarium lateritium</i>                  | FeF237  | MZ493034 | AF310980 | 100.00 | Bw/Bw | c/c | b/a |
| <i>Fusarium</i> sp.                         | FeF132  | MZ493032 | MH931273 | 99.83  | Bv/Bv | c/c | b/a |
| <i>Fusarium</i> sp.                         | FeF133  | MZ493033 | MH931273 | 99.83  | Bv/Bm | b/c | a/a |

|                                  |         |          |              |        |       |     |     |
|----------------------------------|---------|----------|--------------|--------|-------|-----|-----|
| <i>Graphilbum</i> sp.            | FeF221  | MZ492998 | MH861928     | 99.47  | Bm/Bm | b/b | f/f |
| <i>Gyrophthrix</i> sp.           | FeF238  | MZ493069 | KC775756     | 96.15  | A/A   | a/a | f/f |
| <i>Helotiales</i> sp. 1          | FeF9    | MZ492994 | GU174285     | 98.80  | A/A   | b/b | f/a |
| <i>Helotiales</i> sp. 1          | FeF20   | MZ492995 | GU174285     | 98.97  | A/Bs  | b/c | f/a |
| <i>Helotiales</i> sp. 1          | FeF189  | MZ492993 | GU174285     | 98.80  | A/A   | b/b | a/a |
| <i>Herpotrichia</i> sp.          | FeF218  | MZ492964 | KT268517     | 99.18  | A/A   | c/c | a/a |
| <i>Hymenoscyphus caudatus</i>    | FeF217  | MZ492984 | KM114539     | 99.79  | A/A   | b/b | b/b |
| <i>Hymenoscyphus fraxineus</i>   | FeF164  | MZ492991 | LLCC00000000 | 100.00 | A/A   | b/b | b/b |
| <i>Hymenoscyphus scutula</i>     | FeF239  | MZ492988 | MK674606     | 99.48  | A/A   | b/b | b/b |
| <i>Hymenoscyphus scutula</i>     | FeF240  | MZ492990 | MH858736     | 100.00 | A/A   | c/c | b/b |
| <i>Hymenoscyphus</i> sp.         | FeF177  | MZ492986 | MK674606     | 96.68  | A/A   | b/b | b/b |
| <i>Hypholoma fasciculare</i>     | FeF241  | MZ493083 | FJ481034     | 99.86  | C/C   | c/c | f/f |
| <i>Hypoderma rubi</i>            | FeF76   | MZ493023 | GU138735     | 96.36  | Bs/Bs | b/b | b/b |
| <i>Hypoderma rubi</i>            | FeF78a  | MZ493020 | GU138735     | 96.36  | Bs/Bs | b/b | c/c |
| <i>Hypoderma rubi</i>            | FeF184  | MZ493021 | GU138735     | 96.36  | Bm/Bm | b/b | b/b |
| <i>Hypoderma rubi</i>            | FeF203  | MZ493024 | GU138735     | 96.10  | Bm/Bm | b/b | b/b |
| <i>Hypoderma rubi</i>            | FeF224  | MZ493022 | GU138735     | 96.36  | Bm/Bm | b/b | b/b |
| <i>Lanzia</i> sp.                | FeF26   | MZ493011 | LT158431     | 96.96  | Bv/Bv | c/c | a/a |
| <i>Lanzia</i> sp.                | FeF248  | MZ493012 | LT158431     | 97.41  | Bw/Bw | c/c | b/b |
| <i>Lasiosphaeriaceae</i> sp.     | FeF219  | MZ493051 | KF527821     | 99.30  | C/C   | c/c | b/b |
| <i>Lasiosphaeriaceae</i> sp.     | FeF198  | MZ493052 | KF527821     | 99.30  | C/C   | b/b | b/b |
| <i>Lemonniera</i> sp.            | FeF88   | MZ493010 | KX096679     | 99.81  | Bs/Bs | b/b | a/a |
| <i>Leptosphaeria conoidea</i>    | FeF93   | MZ492958 | MH863856     | 100.00 | A/A   | b/b | b/c |
| <i>Leptosphaeria rubefaciens</i> | FeF120a | MZ492942 | JF740242     | 100.00 | A/A   | b/b | a/a |
| <i>Leptosphaeria urticae</i>     | FeF166  | MZ492960 | NR_164494    | 100.00 | A/A   | c/c | b/a |
| <i>Leptosphaeria</i> sp. 1       | FeF188  | MZ492955 | KC965764     | 94.72  | Bs/Bs | b/b | b/b |
| <i>Leptosphaeria</i> sp. 2       | FeF242  | MZ492956 | KC965764     | 95.33  | Bs/Bs | b/b | b/b |
| <i>Leptospora rubella</i>        | FeF194  | MZ492950 | MH857603     | 99.83  | Bm/Bm | b/b | b/b |
| <i>Leptospora</i> sp.            | FeF200  | MZ492951 | KY031621     | 100.00 | Bm/Bm | b/b | b/b |
| <i>Lophiostoma corticola</i>     | FeF199  | MZ492968 | KU712227     | 100.00 | Bs/Bs | c/c | a/a |

|                                   |         |          |          |        |       |     |     |
|-----------------------------------|---------|----------|----------|--------|-------|-----|-----|
| <i>Malbranchea</i> sp.            | FeF243  | MZ493105 | MN627785 | 94.16  | Bv/Bv | d/d | f/f |
| <i>Microsphaeropsis</i> sp.       | FeF92b  | MZ492937 | MH855867 | 100.00 | A/A   | c/c | b/b |
| <i>Mortierella</i> sp.            | FeF180  | MZ493104 | MF423577 | 99.84  | Bs/Bs | c/c | b/b |
| <i>Mycena citrinomarginata</i>    | FeF197  | MZ493086 | MN992229 | 99.86  | A/Bm  | c/d | b/b |
| <i>Mycena citrinomarginata</i>    | FeF129  | MZ493087 | MN992474 | 99.86  | A/Bm  | c/c | b/b |
| <i>Mycena</i> sp.                 | FeF4    | MZ493088 | JF908495 | 99.86  | Bs/Bs | c/c | b/b |
| <i>Mycena</i> sp.                 | FeF244  | MZ493089 | JF908495 | 100.00 | Bs/Bs | c/c | b/b |
| <i>Mycoarthritis</i> sp. 1        | FeF160  | MZ493003 | KY660951 | 99.27  | Bs/Bs | b/b | f/f |
| <i>Mycoarthritis</i> sp. 2        | FeF171  | MZ493004 | JF449666 | 99.63  | Bm/Bw | b/c | f/f |
| <i>Nemania diffusa</i>            | FeF104  | MZ493061 | MH935016 | 100.00 | C/C   | c/c | a/a |
| <i>Nemania serpens</i>            | FeF245  | MZ493106 | MF161316 | 100.00 | C/C   | b/b | b/b |
| <i>Nemania</i> sp.                | FeF41   | MZ493060 | AF201704 | 99.66  | Bs/Bs | c/c | b/b |
| <i>Neofabraea kienholzii</i>      | FeF85   | MZ492999 | MH864120 | 100.00 | Bw/Bw | b/c | b/b |
| <i>Neofabraea kienholzii</i>      | FeF94a  | MZ493000 | MH864120 | 99.82  | Bm/Bw | b/b | a/a |
| <i>Neonectria</i> sp. 1           | FeF186  | MZ493035 | KR816357 | 99.64  | A/A   | b/c | b/b |
| <i>Neonectria</i> sp. 2           | FeF19   | MZ493036 | JF735313 | 99.82  | A/A   | b/b | b/b |
| <i>Paracucurbitaria corni</i>     | FeF77   | MT547860 | LT623219 | 99.47  | Bm/Bm | b/b | b/b |
| <i>Paraophiobolus arundinis</i>   | FeF202  | MZ492952 | MG520945 | 100.00 | Bs/Bs | c/c | b/b |
| <i>Paraphaeosphaeria michotii</i> | FeF168  | MZ492971 | JX496079 | 100.00 | Bm/Bm | c/c | a/a |
| <i>Paraphaeosphaeria neglecta</i> | FeF109  | MZ492969 | MH860924 | 99.83  | Bw/Bw | c/c | a/a |
| <i>Paraphaeosphaeria neglecta</i> | FeF110  | MZ492970 | MH860924 | 99.32  | Bw/Bw | c/c | b/f |
| <i>Peniophora incarnata</i>       | FeF172  | MZ493090 | MH860518 | 99.37  | C/C   | c/c | b/b |
| <i>Peniophora incarnata</i>       | FeF17   | MZ493091 | MH860518 | 99.53  | C/C   | c/c | a/a |
| <i>Peniophora incarnata</i>       | FeF173  | MZ493092 | MH860518 | 99.84  | C/C   | c/c | f/f |
| <i>Periconia</i> sp. 1            | FeF178a | MZ492966 | MG098330 | 99.83  | A/A   | d/d | a/a |
| <i>Periconia</i> sp. 1            | FeF178  | MZ492967 | MG098330 | 99.83  | A/A   | c/c | b/b |
| <i>Periconia</i> sp. 2            | FeF32   | MZ492965 | MG098330 | 99.14  | A/A   | c/c | b/b |
| <i>Peziza ninguis</i>             | FeF91   | MZ493099 | JF908536 | 100.00 | Bv/Bw | c/c | b/b |
| <i>Peziza varia</i>               | FeF6    | MZ493101 | KU061019 | 100.00 | A/A   | c/b | a/a |
| <i>Pezizomyces</i> sp.            | FeF45   | MZ493100 | MK066897 | 99.84  | A/A   | b/b | f/f |

|                                      |         |          |           |        |       |     |     |
|--------------------------------------|---------|----------|-----------|--------|-------|-----|-----|
| <i>Phacidium lacerum</i>             | FeF246  | MZ493107 | KU942438  | 100.00 | Bs/Bs | c/c | b/b |
| <i>Phlyctema vagabunda</i>           | FeF93a  | MZ493002 | KJ396077  | 100.00 | Bm/Bm | b/b | b/b |
| <i>Phlyctema vagabunda</i>           | FeF136  | MZ493001 | KJ396077  | 100.00 | Bw/Bw | c/c | a/a |
| <i>Phoma</i> sp. 1                   | FeF170a | MZ492938 | KT963795  | 100.00 | A/A   | c/c | b/b |
| <i>Phoma</i> sp. 2                   | FeF163  | MZ492933 | FN868459  | 99.65  | Bw/Bw | c/c | b/b |
| <i>Phoma</i> sp. 3                   | FeF153a | MZ492939 | JF817319  | 99.82  | A/A   | b/c | b/b |
| <i>Phoma</i> sp. 3                   | FeF162  | MZ492940 | JF817319  | 99.82  | A/A   | c/c | b/b |
| <i>Phoma</i> sp. 4                   | FeF89   | MZ492934 | MK066907  | 99.82  | A/A   | c/c | b/b |
| <i>Phoma</i> sp. 4                   | FeF158  | MZ492935 | MK066907  | 99.82  | A/A   | c/c | b/b |
| <i>Phoma</i> sp. 5                   | FeF61   | MZ492936 | MK066907  | 100.00 | A/A   | c/c | b/b |
| <i>Plectosphaerella cucumerina</i>   | FeF161b | MZ493070 | MK183802  | 99.65  | Bs/Bs | d/d | a/a |
| <i>Plenodomus</i> sp. 1              | FeF135  | MZ492943 | MK387923  | 94.26  | Bv/Bv | d/d | b/b |
| <i>Pleospora</i> sp.                 | FeF48   | MZ492944 | KU973715  | 99.84  | Bw/Bw | b/b | a/a |
| <i>Pleospora</i> sp.                 | FeF80   | MZ492945 | KU973715  | 99.84  | Bm/Bm | b/b | a/a |
| <i>Pleospora</i> sp.                 | FeF80a  | MZ492946 | KU973715  | 99.84  | Bm/Bm | b/b | a/a |
| <i>Psathyrella piluliformis</i>      | FeF176  | MZ493096 | MF325991  | 99.86  | A/A   | b/b | b/b |
| <i>Pseudocoleophoma polygonicola</i> | FeF201  | MZ492972 | NR_154274 | 99.81  | Bv/Bv | b/b | a/a |
| <i>Pseudocoleophoma polygonicola</i> | FeF247  | MZ492974 | NR_154274 | 99.62  | Bv/Bv | b/b | a/a |
| <i>Pseudoophiobolus italicus</i>     | FeF106  | MZ492954 | NR_156683 | 99.11  | Bw/Bv | c/c | b/b |
| <i>Pseudoplectania nigrella</i>      | FeF46   | MZ493074 | MN398980  | 99.86  | A/A   | b/b | b/b |
| <i>Pyrenochaeta</i> sp.              | FeF13   | MT547847 | MT236853  | 99.32  | A/A   | b/b | b/a |
| <i>Pyrenochaetopsis leptospora</i>   | FeF97   | MZ492949 | MF795793  | 100.00 | A/A   | B/B | b/b |
| <i>Pyrenopeziza petiolaris</i>       | FeF223  | MZ493014 | MH857804  | 99.29  | Bs/Bs | b/c | b/b |
| <i>Pyrenopeziza</i> sp.              | FeF90   | MZ493013 | MH857804  | 98.94  | A/A   | c/c | a/a |
| <i>Rhexocercosporidium</i> sp.       | FeF100  | MZ493018 | MK584945  | 99.39  | A/A   | c/b | b/c |
| <i>Rhexocercosporidium</i> sp.       | FeF127  | MZ493017 | MK584945  | 99.39  | A/A   | b/c | c/c |
| <i>Rhexocercosporidium</i> sp.       | FeF134  | MZ493019 | MK584945  | 99.80  | A/A   | c/c | b/a |
| <i>Rhexocercosporidium</i> sp.       | FeF175  | MZ493016 | MK584945  | 99.59  | A/Bs  | c/c | b/b |
| <i>Rosellinia abscondita</i>         | FeF125  | MZ493062 | KF719196  | 98.20  | Bs/Bs | b/b | b/b |
| <i>Rosellinia corticium</i>          | FeF167  | MZ493068 | MN984621  | 100.00 | C/C   | c/c | a/a |

|                                     |        |          |           |        |       |     |     |
|-------------------------------------|--------|----------|-----------|--------|-------|-----|-----|
| <i>Rosellinia necatrioides</i>      | FeF187 | MZ493063 | MN984622  | 100.00 | C/C   | c/c | b/b |
| <i>Sistotrema</i> sp.               | FeF130 | MZ493078 | KY430527  | 99.85  | Bm/Bm | c/c | b/b |
| <i>Tetracladium</i> sp.             | FeF92  | MZ493006 | MF615024  | 99.10  | A/A   | b/b | a/a |
| <i>Tetracladium</i> sp.             | FeF94  | MZ493007 | MF615024  | 99.10  | A/A   | b/b | a/b |
| <i>Tilletiopsis washingtonensis</i> | FeF249 | MZ493097 | AF294696  | 99.85  | A/A   | a/a | a/a |
| <i>Trametes versicolor</i>          | FeF63  | MZ493082 | MF782816  | 100.00 | A/A   | c/c | b/b |
| <i>Trichoderma viride</i>           | FeF103 | MZ493038 | MH864422  | 100.00 | C/C   | d/d | f/f |
| <i>Truncatella</i> sp.              | FeF122 | MZ493067 | KT963797  | 100.00 | A/A   | c/d | a/b |
| <i>Typhula</i> sp. 1                | FeF128 | MZ493084 | KR673716  | 99.86  | A/A   | b/b | b/b |
| <i>Typhula</i> sp. 1                | FeF62  | MZ493085 | KR673716  | 99.86  | A/A   | b/b | b/b |
| <i>Typhula</i> sp. 2                | FeF99  | MZ493080 | NR_132792 | 88.67  | A/A   | c/c | b/b |
| <i>Umbelopsis</i> sp.               | FeF50  | MZ493098 | JQ912671  | 100.00 | A/A   | c/c | b/b |
| <i>Vargamyces aquaticus</i>         | FeF250 | MZ492962 | MK347818  | 99.57  | A/A   | b/b | a/a |
| <i>Venturia fraxini</i>             | FeF251 | MZ493108 | EU035457  | 99.66  | A/A   | b/b | b/b |
| <i>Venturia fraxini</i>             | FeF252 | MZ493109 | EU035457  | 99.83  | A/A   | b/b | b/b |
| <i>Verticillium dahliae</i>         | FeF253 | MZ493110 | HE972023  | 100.00 | Bm/Bm | c/c | f/f |
| <i>Xylaria polymorpha</i>           | FeF30  | MZ493064 | MG098262  | 100.00 | C/C   | c/c | b/b |
| <i>Xylaria polymorpha</i>           | FeF49  | MZ493065 | MG098262  | 100.00 | C/C   | c/c | b/b |
| <i>Xylaria</i> sp. 1                | FeF97a | MZ493058 | MF774332  | 97.57  | C/C   | b/b | b/b |

<sup>1-3</sup> Hf 1/Hf 2 -two strains of *Hymenoscyphus fraxineus*. <sup>1</sup> See Table 4, <sup>2-3</sup> See Table 5.
