# Supplementary material for: Fungi Detected in the Previous Year’s Leaf Petioles of Fraxinus excelsior and Their Antagonistic Potential against Hymenoscyphus fraxineus
Source: MDPI journal article supplement (doi:10.3390/f12101412), 2021-10-16
Supplement: s1 [file s1]

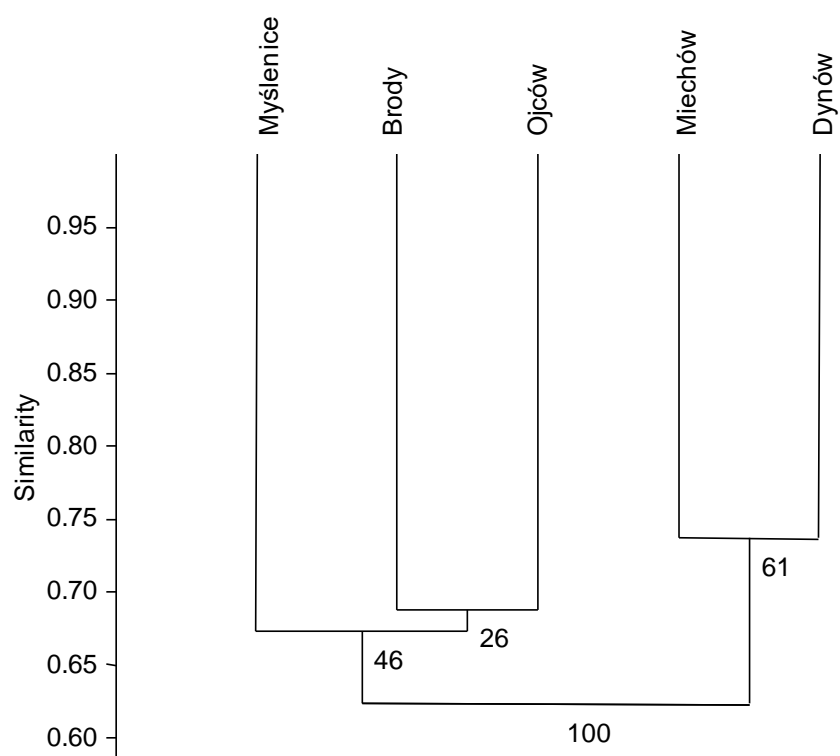

**Figure S3.** Similarity of fungal communities detected *in situ* from fruit bodies on the previous year's leaf petioles of *F. excelsior* in five stands shown by dendrogram based on Bray–Curtis similarity index.
