# Supplementary material for: Fungi Detected in the Previous Year’s Leaf Petioles of Fraxinus excelsior and Their Antagonistic Potential against Hymenoscyphus fraxineus
Source: MDPI journal article supplement (doi:10.3390/f12101412), 2021-10-16
Supplement: s1 [file s1]

**Table S2.** Fungi isolated from the previous year's leaf petioles of *Fraxinus excelsior* (Subsample I) and fungi detected *in situ* from fruit bodies on the previous year's leaf petioles of *F. excelsior* (Subsample II and III).

| Taxonomic rank <sup>1</sup>          | Number of Taxa in Subsamples |           |            |            |
|--------------------------------------|------------------------------|-----------|------------|------------|
|                                      | I                            | II, III   | I, II, III | Sum        |
| <b>Ascomycota</b>                    | <b>80</b>                    | <b>21</b> | <b>20</b>  | <b>121</b> |
| Pezizomycotina                       | 80                           | 21        | 20         | 121        |
| Dothideomycetes                      | 32                           | 6         | 7          | 45         |
| Dothideomycetidae                    | 3                            |           |            | 3          |
| Capnodiales                          | 2                            |           |            | 2          |
| Cladosporiaceae                      | 2                            |           |            | 2          |
| Cladosporium                         | 2                            |           |            | 2          |
| <i>Cladosporium</i> sp. 1            | 1                            |           |            | 1          |
| <i>Cladosporium</i> sp. 2            | 1                            |           |            | 1          |
| Dothideales                          | 1                            |           |            | 1          |
| Saccotheciaceae                      | 1                            |           |            | 1          |
| Aureobasidium                        | 1                            |           |            | 1          |
| <i>Aureobasidium pullulans</i>       | 1                            |           |            | 1          |
| Incertae sedis                       | 1                            | 1         | 1          | 3          |
| Botryosphaeriales                    |                              | 1         |            | 1          |
| Botryosphaeriaceae                   |                              | 1         |            | 1          |
| Diplodia                             |                              | 1         |            | 1          |
| <i>Diplodia fraxini</i>              |                              | 1         |            | 1          |
| Incertae sedis                       | 1                            |           | 1          | 2          |
| Incertae sedis                       | 1                            |           | 1          | 2          |
| Leptospora                           | 1                            |           | 1          | 2          |
| <i>Leptospora rubella</i>            |                              |           | 1          | 1          |
| <i>Leptospora</i> sp.                | 1                            |           |            | 1          |
| Pleosporomycetidae                   | 28                           | 5         | 6          | 39         |
| Incertae sedis                       | 1                            | 1         |            | 2          |
| Incertae sedis                       | 1                            | 1         |            | 2          |
| Pyrenochaeta                         | 1                            | 1         |            | 2          |
| <i>Pyrenochaeta</i> sp.              | 1                            |           |            | 1          |
| <i>Pyrenochaeta</i> sp.              |                              | 1         |            | 1          |
| Pleosporales                         | 27                           | 4         | 5          | 36         |
| Undetermined                         |                              | 1         |            | 1          |
| Pleosporales                         |                              | 1         |            | 1          |
| <i>Pleosporales</i> sp.              |                              | 1         |            | 1          |
| Amniculicolaceae                     |                              | 1         |            | 1          |
| Amniculicola                         |                              | 1         |            | 1          |
| <i>Amniculicola</i> sp.              |                              | 1         |            | 1          |
| Coniothyriaceae                      | 1                            |           |            | 1          |
| Coniothyrium                         | 1                            |           |            | 1          |
| <i>Coniothyrium cf. dispersellum</i> | 1                            |           |            | 1          |
| Cucurbitariaceae                     | 2                            |           |            | 2          |
| Paracucurbitaria                     | 1                            |           |            | 1          |
| <i>Paracucurbitaria corni</i>        | 1                            |           |            | 1          |
| Pyrenochaetopsis                     | 1                            |           |            | 1          |
| <i>Pyrenochaetopsis leptospora</i>   | 1                            |           |            | 1          |
| Didymellaceae                        | 7                            |           | 1          | 8          |

| Taxonomic rank <sup>1</sup>          | Number of Taxa in Subsamples |         |            |     |
|--------------------------------------|------------------------------|---------|------------|-----|
|                                      | I                            | II, III | I, II, III | Sum |
| Boeremia                             | 1                            |         | 1          | 2   |
| <i>Boeremia exigua</i>               |                              |         | 1          | 1   |
| <i>Boeremia</i> sp.                  | 1                            |         |            | 1   |
| Epicoccum                            | 1                            |         |            | 1   |
| <i>Epicoccum nigrum</i>              | 1                            |         |            | 1   |
| Phoma                                | 5                            |         |            | 5   |
| <i>Phoma</i> sp. 1                   | 1                            |         |            | 1   |
| <i>Phoma</i> sp. 2                   | 1                            |         |            | 1   |
| <i>Phoma</i> sp. 3                   | 1                            |         |            | 1   |
| <i>Phoma</i> sp. 4                   | 1                            |         |            | 1   |
| <i>Phoma</i> sp. 5                   | 1                            |         |            | 1   |
| Didymosphaeriaceae                   | 2                            |         |            | 2   |
| Paraphaeosphaeria                    | 2                            |         |            | 2   |
| <i>Paraphaeosphaeria michotii</i>    | 1                            |         |            | 1   |
| <i>Paraphaeosphaeria neglecta</i>    | 1                            |         |            | 1   |
| Incertae sedis                       | 3                            | 1       | 1          | 5   |
| Periconia                            | 2                            |         |            | 2   |
| <i>Periconia</i> sp. 1               | 1                            |         |            | 1   |
| <i>Periconia</i> sp. 2               | 1                            |         |            | 1   |
| Plenodomus                           | 1                            | 1       |            | 2   |
| <i>Plenodomus</i> sp. 1              | 1                            |         |            | 1   |
| <i>Plenodomus</i> sp. 2              |                              | 1       |            | 1   |
| Pseudocoleophoma                     |                              |         | 1          | 1   |
| <i>Pseudocoleophoma polygonicola</i> |                              |         | 1          | 1   |
| Leptosphaeriaceae                    | 4                            | 1       | 1          | 6   |
| Leptosphaeria                        | 4                            | 1       | 1          | 6   |
| <i>Leptosphaeria conoidea</i>        | 1                            |         |            | 1   |
| <i>Leptosphaeria rubefaciens</i>     | 1                            |         |            | 1   |
| <i>Leptosphaeria sclerotioides</i>   |                              | 1       |            | 1   |
| <i>Leptosphaeria</i> sp. 1           | 1                            |         |            | 1   |
| <i>Leptosphaeria</i> sp. 2           |                              |         | 1          | 1   |
| <i>Leptosphaeria urticae</i>         | 1                            |         |            | 1   |
| Lophiostomataceae                    |                              |         | 1          | 1   |
| Lophiostoma                          |                              |         | 1          | 1   |
| <i>Lophiostoma corticola</i>         |                              |         | 1          | 1   |
| Melanommataceae                      | 1                            |         |            | 1   |
| Herpotrichia                         | 1                            |         |            | 1   |
| <i>Herpotrichia</i> sp.              | 1                            |         |            | 1   |
| Microsphaeropsidaceae                | 1                            |         |            | 1   |
| Microsphaeropsis                     | 1                            |         |            | 1   |
| <i>Microsphaeropsis</i> sp.          | 1                            |         |            | 1   |
| Phaeosphaeriaceae                    | 1                            |         | 1          | 2   |
| Paraophiobolus                       |                              |         | 1          | 1   |
| <i>Paraophiobolus arundinis</i>      |                              |         | 1          | 1   |
| Pseudoophiobolus                     | 1                            |         |            | 1   |
| <i>Pseudoophiobolus italicus</i>     | 1                            |         |            | 1   |
| Pleosporaceae                        | 5                            |         |            | 5   |
| Alternaria                           | 4                            |         |            | 4   |
| <i>Alternaria</i> sp. 1              | 1                            |         |            | 1   |

| Taxonomic rank <sup>1</sup>     | Number of Taxa in Subsamples |         |            |     |
|---------------------------------|------------------------------|---------|------------|-----|
|                                 | I                            | II, III | I, II, III | Sum |
| <i>Alternaria</i> sp. 2         | 1                            |         |            | 1   |
| <i>Alternaria</i> sp. 3         | 1                            |         |            | 1   |
| <i>Alternaria</i> sp. 4         | 1                            |         |            | 1   |
| Pleospora                       | 1                            |         |            | 1   |
| <i>Pleospora</i> sp.            | 1                            |         |            | 1   |
| Venturiales                     |                              |         | 1          | 1   |
| Venturiaceae                    |                              |         | 1          | 1   |
| Venturia                        |                              |         | 1          | 1   |
| <i>Venturia fraxini</i>         |                              |         | 1          | 1   |
| Eurotiomycetes                  | 2                            |         |            | 2   |
| Eurotiomycetidae                | 2                            |         |            | 2   |
| Eurotiales                      | 1                            |         |            | 1   |
| Aspergillaceae                  | 1                            |         |            | 1   |
| Eupenicillium                   | 1                            |         |            | 1   |
| <i>Eupenicillium</i> sp.        | 1                            |         |            | 1   |
| Onygenales                      | 1                            |         |            | 1   |
| Onygenaceae                     | 1                            |         |            | 1   |
| Malbranchea                     | 1                            |         |            | 1   |
| <i>Malbranchea</i> sp.          | 1                            |         |            | 1   |
| Incertae sedis                  | 3                            |         |            | 3   |
| Incertae sedis                  | 3                            |         |            | 3   |
| Incertae sedis                  | 3                            |         |            | 3   |
| Incertae sedis                  | 3                            |         |            | 3   |
| Fusariella                      | 1                            |         |            | 1   |
| <i>Fusariella</i> sp.           | 1                            |         |            | 1   |
| Gyrothrix                       | 1                            |         |            | 1   |
| <i>Gyrothrix</i> sp.            | 1                            |         |            | 1   |
| Vargamyces                      | 1                            |         |            | 1   |
| <i>Vargamyces aquaticus</i>     | 1                            |         |            | 1   |
| Leotiomycetes                   | 11                           | 8       | 11         | 30  |
| Leotiomycetidae                 | 11                           | 8       | 11         | 30  |
| Chaetomellales                  | 1                            |         |            | 1   |
| Chaetomellaceae                 | 1                            |         |            | 1   |
| Discohainesia                   | 1                            |         |            | 1   |
| <i>Discohainesia oenotherae</i> | 1                            |         |            | 1   |
| Helotiales                      | 6                            | 8       | 9          | 23  |
| Undetermined                    |                              | 2       | 1          | 3   |
| Helotiales                      |                              | 2       | 1          | 3   |
| <i>Helotiales</i> sp. 1         |                              |         | 1          | 1   |
| <i>Helotiales</i> sp. 2         |                              | 1       |            | 1   |
| <i>Helotiales</i> sp. 3         |                              | 1       |            | 1   |
| Dermateaceae                    | 2                            |         |            | 2   |
| Neofabraea                      | 1                            |         |            | 1   |
| <i>Neofabraea kienholzii</i>    | 1                            |         |            | 1   |
| Phlyctema                       | 1                            |         |            | 1   |
| <i>Phlyctema vagabunda</i>      | 1                            |         |            | 1   |
| Discinellaceae                  | 1                            |         |            | 1   |
| Lemonniera                      | 1                            |         |            | 1   |
| <i>Lemonniera</i> sp.           | 1                            |         |            | 1   |

| Taxonomic rank <sup>1</sup>    | Number of Taxa in Subsamples |         |            |     |
|--------------------------------|------------------------------|---------|------------|-----|
|                                | I                            | II, III | I, II, III | Sum |
| Helotiaceae                    |                              | 3       | 7          | 10  |
| Cyathicula                     |                              | 3       | 3          | 6   |
| <i>Cyathicula coronata</i>     |                              |         | 1          | 1   |
| <i>Cyathicula fraxinophila</i> |                              |         | 1          | 1   |
| <i>Cyathicula</i> sp. 1        |                              | 1       |            | 1   |
| <i>Cyathicula</i> sp. 2        |                              |         | 1          | 1   |
| <i>Cyathicula</i> sp. 3        |                              | 1       |            | 1   |
| <i>Cyathicula</i> sp. 4        |                              | 1       |            | 1   |
| Hymenoscyphus                  |                              |         | 4          | 4   |
| <i>Hymenoscyphus caudatus</i>  |                              |         | 1          | 1   |
| <i>Hymenoscyphus fraxineus</i> |                              |         | 1          | 1   |
| <i>Hymenoscyphus scutula</i>   |                              |         | 1          | 1   |
| <i>Hymenoscyphus</i> sp.       |                              |         | 1          | 1   |
| Mollisiaceae                   | 1                            |         | 1          | 2   |
| Pyrenopeziza                   | 1                            |         | 1          | 2   |
| <i>Pyrenopeziza petiolaris</i> |                              |         | 1          | 1   |
| <i>Pyrenopeziza</i> sp.        | 1                            |         |            | 1   |
| Pezizellaceae                  |                              | 1       |            | 1   |
| Calycina                       |                              | 1       |            | 1   |
| <i>Calycina</i> sp.            |                              | 1       |            | 1   |
| Ploettnerulaceae               | 1                            |         |            | 1   |
| Rhexocercosporidium            | 1                            |         |            | 1   |
| <i>Rhexocercosporidium</i> sp. | 1                            |         |            | 1   |
| Rutstroemiaceae                | 1                            |         |            | 1   |
| Lanzia                         | 1                            |         |            | 1   |
| <i>Lanzia</i> sp.              | 1                            |         |            | 1   |
| Tricladiaceae                  |                              | 2       |            | 2   |
| Trichopeziza                   |                              | 2       |            | 2   |
| <i>Trichopeziza</i> sp. 1      |                              | 1       |            | 1   |
| <i>Trichopeziza</i> sp. 2      |                              | 1       |            | 1   |
| Phacidiales                    |                              |         | 1          | 1   |
| Phacidiaceae                   |                              |         | 1          | 1   |
| Phacidium                      |                              |         | 1          | 1   |
| <i>Phacidium lacerum</i>       |                              |         | 1          | 1   |
| Rhytismatales                  | 4                            |         | 1          | 5   |
| Calloriaceae                   | 4                            |         |            | 4   |
| Dactylaria                     | 1                            |         |            | 1   |
| <i>Dactylaria</i> sp.          | 1                            |         |            | 1   |
| Mycoarthris                    | 2                            |         |            | 2   |
| <i>Mycoarthris</i> sp. 1       | 1                            |         |            | 1   |
| <i>Mycoarthris</i> sp. 2       | 1                            |         |            | 1   |
| Tetracladium                   | 1                            |         |            | 1   |
| <i>Tetracladium</i> sp.        | 1                            |         |            | 1   |
| Rhytismataceae                 |                              |         | 1          | 1   |
| Hypoderma                      |                              |         | 1          | 1   |
| <i>Hypoderma rubi</i>          |                              |         | 1          | 1   |
| Pezizomycetes                  | 6                            |         |            | 6   |
| Undetermined                   | 1                            |         |            | 1   |
| Undetermined                   | 1                            |         |            | 1   |

| Taxonomic rank <sup>1</sup>     | Number of Taxa in Subsamples |         |            |     |
|---------------------------------|------------------------------|---------|------------|-----|
|                                 | I                            | II, III | I, II, III | Sum |
| Undetermined                    | 1                            |         |            | 1   |
| Pezizomycetes                   | 1                            |         |            | 1   |
| <i>Pezizomycetes</i> sp.        | 1                            |         |            | 1   |
| Pezizomycetidae                 | 5                            |         |            | 5   |
| Pezizales                       | 5                            |         |            | 5   |
| Chorioactidaceae                | 1                            |         |            | 1   |
| Desmazierella                   | 1                            |         |            | 1   |
| <i>Desmazierella acicola</i>    | 1                            |         |            | 1   |
| Pezizaceae                      | 3                            |         |            | 3   |
| Chromelosporium                 | 1                            |         |            | 1   |
| <i>Chromelosporium</i> sp.      | 1                            |         |            | 1   |
| Peziza                          | 2                            |         |            | 2   |
| <i>Peziza ninguis</i>           | 1                            |         |            | 1   |
| <i>Peziza varia</i>             | 1                            |         |            | 1   |
| Sarcosomataceae                 | 1                            |         |            | 1   |
| Pseudoplectania                 | 1                            |         |            | 1   |
| <i>Pseudoplectania nigrella</i> | 1                            |         |            | 1   |
| Sordariomycetes                 | 26                           | 7       | 2          | 35  |
| Diaporthomycetidae              | 8                            | 2       |            | 10  |
| Coniochaetales                  | 4                            |         |            | 4   |
| Coniochaetaceae                 | 4                            |         |            | 4   |
| Coniochaeta                     | 4                            |         |            | 4   |
| <i>Coniochaeta angustispora</i> | 1                            |         |            | 1   |
| <i>Coniochaeta</i> sp. 1        | 1                            |         |            | 1   |
| <i>Coniochaeta</i> sp. 2        | 1                            |         |            | 1   |
| <i>Coniochaeta</i> sp. 3        | 1                            |         |            | 1   |
| Diaporthales                    | 3                            | 2       |            | 5   |
| Diaporthaceae                   | 1                            | 1       |            | 2   |
| Diaporthe                       | 1                            | 1       |            | 2   |
| <i>Diaporthe eres</i>           | 1                            |         |            | 1   |
| <i>Diaporthe</i> sp.            |                              | 1       |            | 1   |
| Gnomoniaceae                    |                              | 1       |            | 1   |
| Apiognomonia                    |                              | 1       |            | 1   |
| <i>Apiognomonia hystrix</i>     |                              | 1       |            | 1   |
| Valsaceae                       | 2                            |         |            | 2   |
| Cytospora                       | 2                            |         |            | 2   |
| <i>Cytospora pruinosa</i>       | 1                            |         |            | 1   |
| <i>Cytospora</i> sp.            | 1                            |         |            | 1   |
| Ophiostomatales                 | 1                            |         |            | 1   |
| Ophiostomataceae                | 1                            |         |            | 1   |
| Graphilbum                      | 1                            |         |            | 1   |
| <i>Graphilbum</i> sp.           | 1                            |         |            | 1   |
| Hypocreomycetidae               | 8                            | 1       | 1          | 10  |
| Glomerellales                   | 3                            |         |            | 3   |
| Glomerellaceae                  | 1                            |         |            | 1   |
| Colletotrichum                  | 1                            |         |            | 1   |
| <i>Colletotrichum acutatum</i>  | 1                            |         |            | 1   |
| Plectosphaerellaceae            | 2                            |         |            | 2   |
| Plectosphaerella                | 1                            |         |            | 1   |

| Taxonomic rank <sup>1</sup>        | Number of Taxa in Subsamples |         |            |     |
|------------------------------------|------------------------------|---------|------------|-----|
|                                    | I                            | II, III | I, II, III | Sum |
| <i>Plectosphaerella cucumerina</i> | 1                            |         |            | 1   |
| Verticillium                       | 1                            |         |            | 1   |
| <i>Verticillium dahliae</i>        | 1                            |         |            | 1   |
| Hypocreales                        | 5                            | 1       | 1          | 7   |
| Bionectriaceae                     | 1                            | 1       |            | 2   |
| Clonostachys                       | 1                            |         |            | 1   |
| <i>Clonostachys rosea</i>          | 1                            |         |            | 1   |
| Lasionectria                       |                              | 1       |            | 1   |
| <i>Lasionectria</i> sp.            |                              | 1       |            | 1   |
| Hypocreaceae                       | 1                            |         |            | 1   |
| Trichoderma                        | 1                            |         |            | 1   |
| <i>Trichoderma viride</i>          | 1                            |         |            | 1   |
| Nectriaceae                        | 3                            |         | 1          | 4   |
| Fusarium                           | 2                            |         |            | 2   |
| <i>Fusarium lateritium</i>         | 1                            |         |            | 1   |
| <i>Fusarium</i> sp.                | 1                            |         |            | 1   |
| Neonectria                         | 1                            |         | 1          | 2   |
| <i>Neonectria</i> sp. 1            | 1                            |         |            | 1   |
| <i>Neonectria</i> sp. 2            |                              |         | 1          | 1   |
| Sordariomycetidae                  | 2                            |         |            | 2   |
| Sordariales                        | 2                            |         |            | 2   |
| Undetermined                       | 1                            |         |            | 1   |
| Lasiosphaeriaceae                  | 1                            |         |            | 1   |
| <i>Lasiosphaeriaceae</i> sp.       | 1                            |         |            | 1   |
| Chaetomiaceae                      | 1                            |         |            | 1   |
| Chaetomium                         | 1                            |         |            | 1   |
| <i>Chaetomium globosum</i>         | 1                            |         |            | 1   |
| Xylariomycetidae                   | 8                            | 4       | 1          | 13  |
| Amphisphaeriales                   | 1                            |         |            | 1   |
| Bartaliniaceae                     | 1                            |         |            | 1   |
| Truncatella                        | 1                            |         |            | 1   |
| <i>Truncatella</i> sp.             | 1                            |         |            | 1   |
| Xylariales                         | 7                            | 4       | 1          | 12  |
| Lopadostomataceae                  |                              | 1       |            | 1   |
| Anthostoma                         |                              | 1       |            | 1   |
| <i>Anthostoma turgidum</i>         |                              | 1       |            | 1   |
| Xylariaceae                        | 7                            | 3       | 1          | 11  |
| Nemania                            | 3                            |         |            | 3   |
| <i>Nemania diffusa</i>             | 1                            |         |            | 1   |
| <i>Nemania serpens</i>             | 1                            |         |            | 1   |
| <i>Nemania</i> sp.                 | 1                            |         |            | 1   |
| Rosellinia                         | 3                            |         |            | 3   |
| <i>Rosellinia abscondita</i>       | 1                            |         |            | 1   |
| <i>Rosellinia corticium</i>        | 1                            |         |            | 1   |
| <i>Rosellinia nectrioides</i>      | 1                            |         |            | 1   |
| Xylaria                            | 1                            | 3       | 1          | 5   |
| <i>Xylaria polymorpha</i>          | 1                            |         |            | 1   |
| <i>Xylaria</i> sp. 1               |                              |         | 1          | 1   |
| <i>Xylaria</i> sp. 2               |                              | 1       |            | 1   |

| Taxonomic rank <sup>1</sup>     | Number of Taxa in Subsamples |         |            |     |
|---------------------------------|------------------------------|---------|------------|-----|
|                                 | I                            | II, III | I, II, III | Sum |
| <i>Xylaria</i> sp. 3            |                              | 1       |            | 1   |
| <i>Xylaria</i> sp. 4            |                              | 1       |            | 1   |
| Basidiomycota                   | 13                           | 2       | 2          | 17  |
| Agaricomycotina                 | 11                           | 2       | 2          | 15  |
| Agaricomycetes                  | 11                           | 2       | 2          | 15  |
| Undetermined                    | 1                            |         |            | 1   |
| Undetermined                    | 1                            |         |            | 1   |
| Undetermined                    | 1                            |         |            | 1   |
| Agaricomycetes                  | 1                            |         |            | 1   |
| <i>Agaricomycetes</i> sp.       | 1                            |         |            | 1   |
| Agaricomycetidae                | 7                            | 2       | 2          | 11  |
| Agaricales                      | 6                            | 2       | 2          | 10  |
| Marasmiaceae                    |                              | 1       |            | 1   |
| Marasmius                       |                              | 1       |            | 1   |
| <i>Marasmius epiphyllus</i>     |                              | 1       |            | 1   |
| Mycenaceae                      | 2                            |         |            | 2   |
| Mycena                          | 2                            |         |            | 2   |
| <i>Mycena citrinomarginata</i>  | 1                            |         |            | 1   |
| <i>Mycena</i> sp.               | 1                            |         |            | 1   |
| Psathyrellaceae                 | 3                            |         |            | 3   |
| Coprinellus                     | 2                            |         |            | 2   |
| <i>Coprinellus disseminatus</i> | 1                            |         |            | 1   |
| <i>Coprinellus micaceus</i>     | 1                            |         |            | 1   |
| Psathyrella                     | 1                            |         |            | 1   |
| <i>Psathyrella piluliformis</i> | 1                            |         |            | 1   |
| Strophariaceae                  | 1                            |         |            | 1   |
| Hypholoma                       | 1                            |         |            | 1   |
| <i>Hypholoma fasciculare</i>    | 1                            |         |            | 1   |
| Typhulaceae                     |                              | 1       | 2          | 3   |
| Typhula                         |                              | 1       | 2          | 3   |
| <i>Typhula erythropus</i>       |                              | 1       |            | 1   |
| <i>Typhula</i> sp. 1            |                              |         | 1          | 1   |
| <i>Typhula</i> sp. 2            |                              |         | 1          | 1   |
| Atheliales                      | 1                            |         |            | 1   |
| Atheliaceae                     | 1                            |         |            | 1   |
| Athelia                         | 1                            |         |            | 1   |
| <i>Athelia</i> sp.              | 1                            |         |            | 1   |
| Incertae sedis                  | 3                            |         |            | 3   |
| Cantharellales                  | 1                            |         |            | 1   |
| Hydnaceae                       | 1                            |         |            | 1   |
| Sistotrema                      | 1                            |         |            | 1   |
| <i>Sistotrema</i> sp.           | 1                            |         |            | 1   |
| Polyporales                     | 1                            |         |            | 1   |
| Polyporaceae                    | 1                            |         |            | 1   |
| Trametes                        | 1                            |         |            | 1   |
| <i>Trametes versicolor</i>      | 1                            |         |            | 1   |
| Russulales                      | 1                            |         |            | 1   |
| Peniophoraceae                  | 1                            |         |            | 1   |
| Peniophora                      | 1                            |         |            | 1   |

| Taxonomic rank <sup>1</sup>         | Number of Taxa in Subsamples |         |            |     |
|-------------------------------------|------------------------------|---------|------------|-----|
|                                     | I                            | II, III | I, II, III | Sum |
| <i>Peniophora incarnata</i>         | 1                            |         |            | 1   |
| Pucciniomycotina                    | 1                            |         |            | 1   |
| Microbotryomycetes                  | 1                            |         |            | 1   |
| Incertae sedis                      | 1                            |         |            | 1   |
| Incertae sedis                      | 1                            |         |            | 1   |
| Chrysozymaceae                      | 1                            |         |            | 1   |
| Fellozyma                           | 1                            |         |            | 1   |
| <i>Fellozyma</i> sp.                | 1                            |         |            | 1   |
| Ustilaginomycotina                  | 1                            |         |            | 1   |
| Exobasidiomycetes                   | 1                            |         |            | 1   |
| Exobasidiomycetidae                 | 1                            |         |            | 1   |
| Entylomatales                       | 1                            |         |            | 1   |
| Entylomataceae                      | 1                            |         |            | 1   |
| Tilletiopsis                        | 1                            |         |            | 1   |
| <i>Tilletiopsis washingtonensis</i> | 1                            |         |            | 1   |
| Mucoromycota                        | 2                            |         |            | 2   |
| Mortierellomycotina                 | 1                            |         |            | 1   |
| Mortierellomycetes                  | 1                            |         |            | 1   |
| Incertae sedis                      | 1                            |         |            | 1   |
| Mortierellales                      | 1                            |         |            | 1   |
| Mortierellaceae                     | 1                            |         |            | 1   |
| Mortierella                         | 1                            |         |            | 1   |
| <i>Mortierella</i> sp.              | 1                            |         |            | 1   |
| Mucoromycotina                      | 1                            |         |            | 1   |
| Umbelopsidomycetes                  | 1                            |         |            | 1   |
| Incertae sedis                      | 1                            |         |            | 1   |
| Umbelopsidales                      | 1                            |         |            | 1   |
| Umbelopsidaceae                     | 1                            |         |            | 1   |
| Umbelopsis                          | 1                            |         |            | 1   |
| <i>Umbelopsis</i> sp.               | 1                            |         |            | 1   |
| <sup>1</sup> Phylum                 |                              |         |            |     |
| Subphylum                           |                              |         |            |     |
| Class                               |                              |         |            |     |
| Subclass                            |                              |         |            |     |
| Order                               |                              |         |            |     |
| Family                              |                              |         |            |     |
| <i>Species.</i>                     |                              |         |            |     |
