# Supplementary material for: Fungi Detected in the Previous Year’s Leaf Petioles of Fraxinus excelsior and Their Antagonistic Potential against Hymenoscyphus fraxineus
Source: MDPI journal article supplement (doi:10.3390/f12101412), 2021-10-16
Supplement: s1 [file s1]

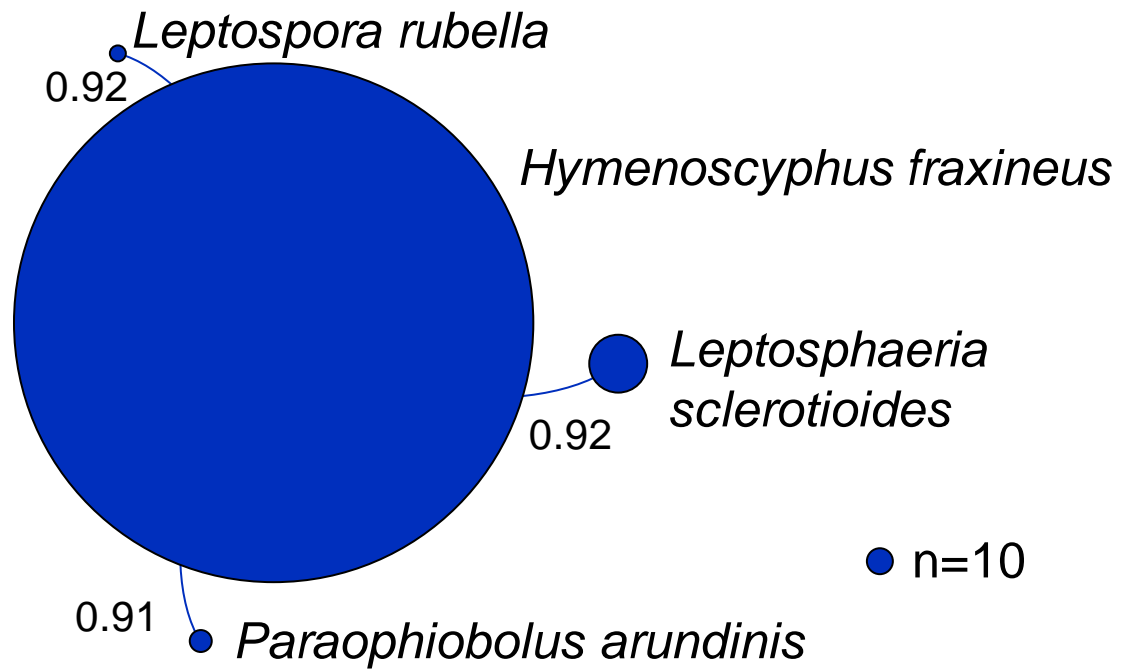

**Figure S4.** Network of co-occurrence of fungi detected *in situ* from fruit bodies on the previous year's leaf petioles of *Fraxinus excelsior* in five stands, in southern Poland, determined on the basis of data grouped for the study plots. Each connection shows a strong (Spearman's  $P > 0.6$ ) and significant ( $P < 0.05$ ) correlation. Blue lines indicate positive correlation. The same colour represents fungal taxa with potential co-occurrence in the same module. The frequency of the species was indicated by the size of each node.
