# Supplementary material for: Fungi Detected in the Previous Year’s Leaf Petioles of Fraxinus excelsior and Their Antagonistic Potential against Hymenoscyphus fraxineus
Source: MDPI journal article supplement (doi:10.3390/f12101412), 2021-10-16

**Figure S1.** Phylogram obtained from Maximum Likelihood (ML) analyses of the ITS1/2 data for the isolated fungal taxa. Sequences obtained during this study are presented in bold type. The Bootstrap values  $\geq 75\%$  for ML and Bayesian Inference (BI) analyses are presented at branch as follows: ML/BI. \* Bootstrap values  $<75\%$ . The tree is drawn to scale (see bar) with branch length measured in the number of substitutions per site. *Fellozyma inositophila* and *Fellozyma* sp. represent the outgroup.

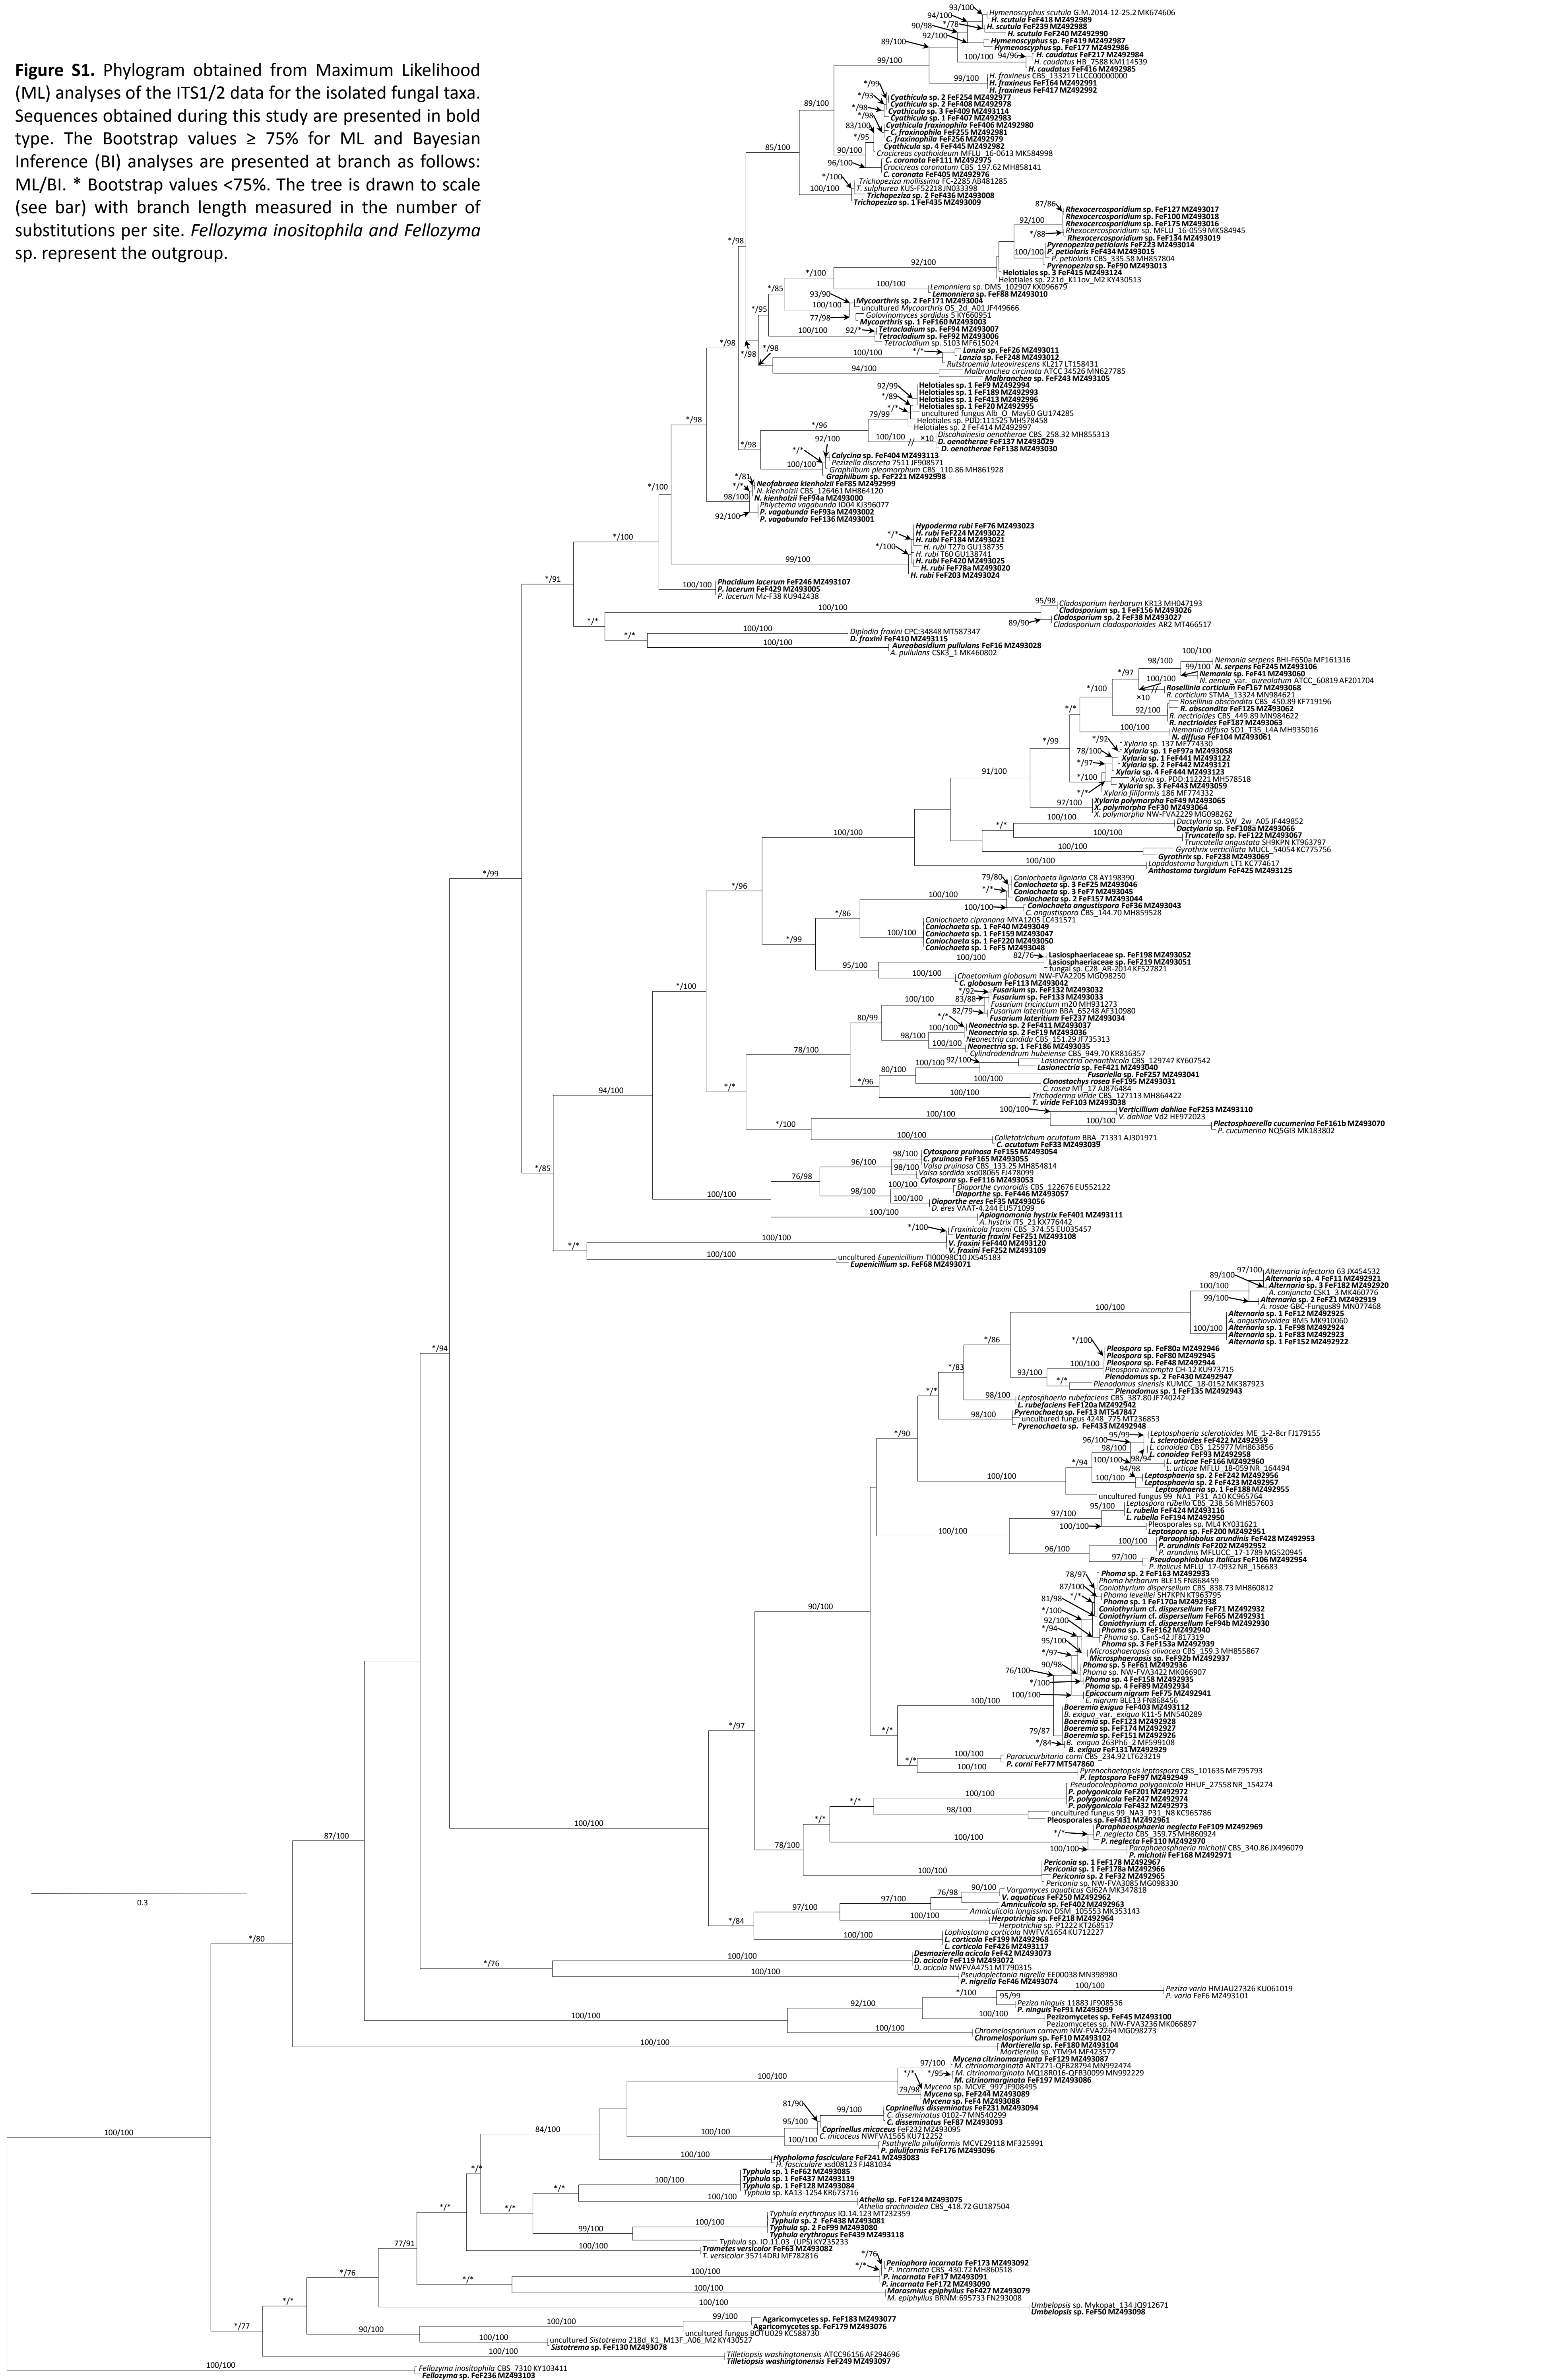

Supplement: s1 [file s1]
