# Supplementary material for: Fungi Detected in the Previous Year’s Leaf Petioles of Fraxinus excelsior and Their Antagonistic Potential against Hymenoscyphus fraxineus
Source: MDPI journal article supplement (doi:10.3390/f12101412), 2021-10-16
Supplement: s1 [file s1]

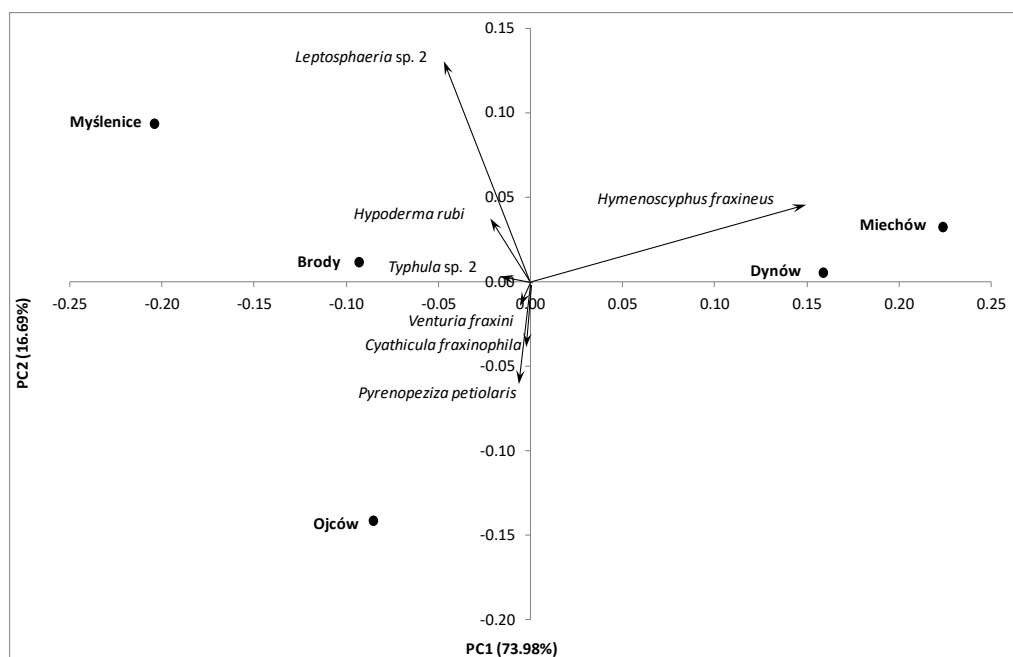

**Figure S2.** Principal component analysis (PCA) with frequencies of fungal variables represented by arrows and sites represented by black circles, for mycobiota detected in situ from fruit bodies on the previous year's leaf petioles of *F. excelsior*.
